# Supplementary material
Source: PubMed Central journal article supplement (PMC4571795)
Supplement: supp_the2015-0083_Supplemental_Tables.pdf [file supp_the2015-0083_Supplemental_Tables.pdf]

Supplemental Tables for:  
Temporal Trends and Predictors for Cancer Clinical Trial Availability for Medically Underserved Populations  
David Gerber et al.

**Table S1.** Predictors of trials not opening at safety-net site (interventional/therapeutic trials only)—  
univariate analysis

| Characteristic                  | Not activated at safety-net site | OR (95% CI)        | P value | Overall P value |
|---------------------------------|----------------------------------|--------------------|---------|-----------------|
| <i>Activation year</i>          |                                  |                    |         |                 |
| 1991-2006                       | 7/186 (4%)                       | Reference          |         |                 |
| 2007-2014                       | 118/406 (29%)                    | 10.47 (4.78-22.96) | <0.001  | <0.001          |
| <i>Primary management group</i> |                                  |                    |         |                 |
| GI/GU                           | 15/100 (15%)                     | 3.11 (1.08-8.92)   | 0.04    |                 |
| Lung/ENT                        | 26/86 (30%)                      | 7.63 (2.77-20.98)  | <0.001  | <0.001          |
| Breast, Gyn                     | 9/169 (5%)                       | 0.99 (0.32-3.05)   | 0.99    |                 |
| Radiation Oncol                 | 5/93 (5%)                        | Reference          |         |                 |
| Malig Heme                      | 38/88 (41%)                      | 12.18 (4.50-33.00) | <0.001  |                 |
| Other                           | 34/56 (61%)                      | 27.20 (9.53-77.62) | <0.001  |                 |
| <i>Phase</i>                    |                                  |                    |         |                 |
| Not Applicable                  | 3/28 (11%)                       | Reference          |         |                 |
| Pilot/Feasibility, 1            | 29/92 (32%)                      | 3.84 (1.07-13.74)  | 0.04    | 0.012           |
| 2                               | 56/245 (23%)                     | 2.47 (0.72-8.48)   | 0.15    |                 |
| 3                               | 37/227 (16%)                     | 1.62 (0.47-5.65)   | 0.45    |                 |
| <i>Sponsor type</i>             |                                  |                    |         |                 |
| Industrial                      | 78/252 (31%)                     | 2.80 (1.86-4.20)   | <0.001  | <0.001          |
| Other                           | 47/340 (14%)                     | Reference          |         |                 |
| <i>Investigator Initiated</i>   |                                  |                    |         |                 |
| Yes                             | 19/112 (17%)                     | 0.72 (0.42-1.24)   | 0.23    | 0.23            |
| No                              | 106/480 (22%)                    | Reference          |         |                 |
| <i>Rare disease</i>             |                                  |                    |         |                 |
| Yes                             | 12/35 (34%)                      | 1.05 (0.49-2.29)   | 0.89    | 0.89            |
| No                              | 50/151 (33%)                     | Reference          |         |                 |

OR>1: less likely to be activated at safety-net site

**Table S2.** Predictors of trials not opening at safety-net site (interventional/therapeutic trials)—  
multivariate analysis

| <b>Characteristic</b>           | <b>OR (95% CI)</b> | <b>P value</b> | <b>Overall P value</b> |
|---------------------------------|--------------------|----------------|------------------------|
| <i>Activation year</i>          |                    |                |                        |
| 1991-2006                       | Reference          |                | <0.001                 |
| 2007-2014                       | 9.65 (4.21-22.08)  | <0.001         |                        |
| <i>Primary management group</i> |                    |                |                        |
| GI/GU                           | 3.24 (1.06-9.89)   | 0.04           | <0.001                 |
| Lung/ENT                        | 6.27 (2.16-18.21)  | <0.001         |                        |
| Breast, Gyn                     | 1.27 (0.40-4.08)   | 0.69           |                        |
| Radiation Oncol                 | Reference          |                |                        |
| Malig Heme                      | 11.91 (3.99-35.52) | <0.001         |                        |
| Other                           | 28.84 (9.37-88.72) | <0.001         |                        |
| <i>Phase</i>                    |                    |                |                        |
| Not Applicable                  | Reference          |                | 0.04                   |
| Pilot/Feasibility, 1            | 6.57 (1.52-28.49)  | 0.01           |                        |
| 2                               | 5.19 (1.24-21.80)  | 0.02           |                        |
| 3                               | 3.47 (0.81-14.80)  | 0.09           |                        |
| <i>Sponsor Type</i>             |                    |                |                        |
| Industrial                      | 1.69 (1.00-2.84)   | 0.05           | 0.05                   |
| Other                           | Reference          |                |                        |

OR>1: less likely to be activated at safety-net site
